# Supplementary material for: Deep neural networks allow expert-level brain meningioma detection, segmentation and improvement of current clinical practice
Source: bioRxiv or medRxiv preprint supplement (doi:10.1101/2021.05.11.21256429), 2022-01-07
Supplement: Supplementary file [file media-1.pdf]

**Supplementary Table 1. Accuracy measures between algorithm predictions and experts' segmentations.** The table includes accuracy measures (Dice scores) for each MRI in the test set, used to calculate mean and median accuracy measures between algorithm predictions (**Prediction**) and ground truth (**Ground**), and to evaluate inter-expert variability between clinical experts (**Expert\_1, Expert\_2, Expert\_3**) and ground truth and within clinical experts.

| MRI scan number | Prediction/Ground | Prediction/Expert_1 | Prediction/Expert_2 | Prediction/Expert_3 | Expert_1/Ground | Expert_2/Ground | Expert_3/Ground | Expert_1/Expert_2 | Expert_1/Expert_3 | Expert_2/Expert_3 |
|-----------------|-------------------|---------------------|---------------------|---------------------|-----------------|-----------------|-----------------|-------------------|-------------------|-------------------|
| 1               | 0.887118336       | 0.870557471         | 0.880113664         | 0.894409283         | 0.863276836     | 0.860588235     | 0.88754024      | 0.804210526       | 0.852055757       | 0.924633332       |
| 2               | 0.948197265       | 0.910379488         | 0.941184953         | 0.934678535         | 0.906077562     | 0.958192788     | 0.95614932      | 0.904644939       | 0.88913586        | 0.958857671       |
| 3               | 0.833887043       | 0.849272349         | 0.81737013          | 0.804321729         | 0.765510949     | 0.866032211     | 0.839176003     | 0.744661922       | 0.728865528       | 0.838823946       |
| 4               | 0.916545083       | 0.861760666         | 0.91408635          | 0.908233276         | 0.823160673     | 0.935859649     | 0.930682132     | 0.822079842       | 0.808188266       | 0.970689418       |
| 5               | 0.832552194       | 0.741920375         | 0.732342007         | 0.757005053         | 0.867483296     | 0.819635963     | 0.844396083     | 0.839475328       | 0.857318573       | 0.854534388       |
| 6               | 0.791735058       | 0.835798337         | 0.787650019         | 0.761203764         | 0.892188052     | 0.933064191     | 0.924448616     | 0.893986361       | 0.869654465       | 0.939894993       |
| 7               | 0.945065505       | 0.914079978         | 0.94389929          | 0.947581292         | 0.903991444     | 0.956089161     | 0.958201192     | 0.909141505       | 0.905501193       | 0.965455533       |
| 8               | 0.936232318       | 0.937140612         | 0.938429406         | 0.939963554         | 0.945342007     | 0.963419791     | 0.962333309     | 0.944830032       | 0.945144533       | 0.966541358       |
| 9               | 0.866796621       | 0.805488297         | 0.881763527         | 0.778214486         | 0.761764706     | 0.902348578     | 0.814931651     | 0.801213961       | 0.661672909       | 0.835483871       |
| 10              | 0.940563456       | 0.94411207          | 0.936105746         | 0.930686991         | 0.934479242     | 0.959174979     | 0.944101093     | 0.921178325       | 0.911767045       | 0.948569387       |
| 11              | 0.942830878       | 0.934234563         | 0.953186304         | 0.933874601         | 0.926994461     | 0.941680961     | 0.926375882     | 0.921782968       | 0.889421651       | 0.952636821       |
| 12              | 0.931870738       | 0.88797587          | 0.804342979         | 0.931157484         | 0.892007823     | 0.805493574     | 0.94338031      | 0.806647578       | 0.869427769       | 0.79482533        |
| 13              | 0.217101895       | 0.42948718          | 0.221164021         | 0.325688073         | 0.583028827     | 0.767339772     | 0.691358025     | 0.460833333       | 0.597359736       | 0.696969697       |
| 14              | 0.8181815152      | 0.865459077         | 0.902699309         | 0.896918517         | 0.89664903      | 0.956442379     | 0.951372675     | 0.911915237       | 0.889873968       | 0.951546628       |
| 15              | 0.89753344        | 0.87410994          | 0.870552075         | 0.834173105         | 0.847582664     | 0.914045193     | 0.900421053     | 0.815592963       | 0.77033214        | 0.915800204       |
| 16              | 0.818972332       | 0.839929639         | 0.839555203         | 0.80823402          | 0.884796238     | 0.931330472     | 0.894650476     | 0.892125984       | 0.821211035       | 0.898187809       |
| 17              | 0.881352996       | 0.923955432         | 0.916847137         | 0.92964385          | 0.876153827     | 0.907912075     | 0.880405535     | 0.911752056       | 0.89388305        | 0.916216115       |
| 18              | 0.909179648       | 0.905289585         | 0.908199246         | 0.905409731         | 0.930635602     | 0.954754955     | 0.95169797      | 0.932670767       | 0.920064335       | 0.960024205       |
| 19              | 0.909000549       | 0.913518576         | 0.901424501         | 0.903099145         | 0.906333073     | 0.926237694     | 0.907865169     | 0.89607667        | 0.88172043        | 0.946643253       |
| 20              | 0.913867822       | 0.852272727         | 0.89380531          | 2.91E-11            | 0.837378641     | 0.920906801     | 2.81E-11        | 0.804410911       | 3.29E-11          | 2.69E-11          |
| 21              | 0.818867925       | 0.847317744         | 0.867406924         | 0.726020138         | 0.884337349     | 0.897677605     | 0.819875776     | 0.866958151       | 0.747061829       | 0.812192724       |
| 22              | 7.99E-11          | 1.12E-10            | 1.12E-10            | 8.49E-11            | 0.768872321     | 0.536130536     | 0.494650206     | 0.577504197       | 0.500965251       | 0.817962337       |
| 23              | 0.874928612       | 0.764102564         | 0.876430206         | 0.84521576          | 0.82166065      | 0.930705658     | 0.785896781     | 0.845151954       | 0.67610419        | 0.800409417       |
| 24              | 0.848056537       | 0.856880734         | 0.881701374         | 0.752941176         | 0.830488289     | 0.874422188     | 0.859708888     | 0.877523553       | 0.751229291       | 0.783259612       |
| 25              | 0.956526362       | 0.921906008         | 0.939407666         | 0.95728622          | 0.93031817      | 0.948666106     | 0.957936889     | 0.932427726       | 0.923286057       | 0.960392607       |
| 26              | 0.954908676       | 0.948584859         | 0.961866047         | 0.948701477         | 0.949477182     | 0.952675295     | 0.94550783      | 0.954341987       | 0.931248823       | 0.939560688       |
| 27              | 0.784209252       | 0.776808584         | 0.773653796         | 0.763354618         | 0.814313266     | 0.836505894     | 0.700496757     | 0.784975696       | 0.717781534       | 0.68258564        |
| 28              | 0.919534538       | 0.916094401         | 0.86403412          | 0.936504398         | 0.910286697     | 0.849185497     | 0.932787946     | 0.82347379        | 0.905131112       | 0.86608424        |
| 29              | 0.957274827       | 0.938842689         | 0.954006364         | 0.937873357         | 0.925986559     | 0.955720923     | 0.933898708     | 0.934680309       | 0.907867409       | 0.945324598       |
| 30              | 0.88191396        | 0.843243243         | 0.870717679         | 0.871639202         | 0.81577026      | 0.890580156     | 0.902398677     | 0.86204955        | 0.810084034       | 0.848796448       |
| 31              | 0.902957603       | 0.874674167         | 0.903165152         | 0.922795394         | 0.87756774      | 0.905108557     | 0.902877351     | 0.885789256       | 0.892204946       | 0.930641526       |
| 32              | 0.931156107       | 0.904606145         | 0.942433176         | 0.925612588         | 0.875812008     | 0.914483239     | 0.945525248     | 0.907174728       | 0.874451518       | 0.951634263       |
| 33              | 0.756578211       | 0.792364628         | 0.79640279          | 0.755991162         | 0.86009151      | 0.903269623     | 0.930608148     | 0.90988212        | 0.859550851       | 0.92996128        |
| 34              | 0.791955617       | 0.637889688         | 0.847195358         | 0.85731782          | 0.800808898     | 0.861132661     | 0.840262582     | 0.719489982       | 0.676271186       | 0.927027027       |
| 35              | 0.656973294       | 0.605057758         | 0.70152647          | 0.314392991         | 0.623491751     | 0.856489713     | 0.456600362     | 0.64137931        | 0.448105057       | 0.42304546        |
| 36              | 0.88388521        | 0.786494538         | 0.910899654         | 0.880512627         | 0.847861397     | 0.913752914     | 0.822204344     | 0.833157339       | 0.71409396        | 0.852743782       |
| 37              | 0.74384394        | 0.737067428         | 0.697517622         | 0.774115513         | 0.868525896     | 0.870391705     | 0.8685748578    | 0.826556544       | 0.831453634       | 0.869112815       |
| 38              | 0.932285648       | 0.863797468         | 0.931734317         | 0.911025968         | 0.890645586     | 0.943314996     | 0.902927581     | 0.876445846       | 0.818530965       | 0.912565905       |
| 39              | 0.890748899       | 0.840776699         | 0.875055979         | 0.870289568         | 0.847648262     | 0.877407233     | 0.872983037     | 0.8681605         | 0.783869506       | 0.85210084        |
| 40              | 0.579686323       | 0.611632365         | 0.563187906         | 0.550397593         | 0.921335067     | 0.944605124     | 0.934708862     | 0.901891133       | 0.884209132       | 0.960090909       |
| 41              | 0.904299584       | 0.867835149         | 0.903283052         | 0.838550247         | 0.879664179     | 0.926104066     | 0.872003251     | 0.872483221       | 0.817766708       | 0.894200627       |
| 42              | 0.793487575       | 0.731053604         | 0.781141869         | 0.799497698         | 0.854893138     | 0.92834891      | 0.911632551     | 0.839407745       | 0.818330606       | 0.921756689       |
| 43              | 0.863291139       | 0.788743254         | 0.852328431         | 0.783819984         | 0.777524677     | 0.919491525     | 0.838059899     | 0.753104456       | 0.644839414       | 0.869228785       |
| 44              | 0.929891873       | 0.894522576         | 0.928408091         | 0.879701686         | 0.891467333     | 0.945436002     | 0.902293434     | 0.896452368       | 0.838966203       | 0.909608992       |
| 45              | 0.837678722       | 0.860846561         | 0.826638984         | 0.773202662         | 0.936638682     | 0.931421537     | 0.868774651     | 0.906554039       | 0.836699285       | 0.91380195        |
| 46              | 0.895056871       | 0.903003215         | 0.869033048         | 0.781349516         | 0.891466083     | 0.92319479      | 0.841022727     | 0.850730761       | 0.761695371       | 0.878485295       |
| 47              | 0.69337254        | 0.719309758         | 0.652731491         | 0.714148445         | 0.911621175     | 0.878519898     | 0.89528484      | 0.84633843        | 0.889402506       | 0.881450774       |
| 48              | 0.893364533       | 0.842234249         | 0.913496052         | 0.890947852         | 0.790631248     | 0.908554075     | 0.892608089     | 0.853424233       | 0.772943259       | 0.894736842       |
| 49              | 0.862635312       | 0.867752443         | 0.79706345          | 0.802718717         | 0.835519677     | 0.828529073     | 0.825558476     | 0.720947725       | 0.717525773       | 0.894745001       |
| 50              | 0.893234165       | 0.912571273         | 0.899696786         | 0.80454127          | 0.852895951     | 0.919497869     | 0.843661282     | 0.858809802       | 0.738777718       | 0.836033188       |
| 51              | 0.826552463       | 0.834315652         | 0.827034884         | 0.757670632         | 0.867773948     | 0.901158828     | 0.854265403     | 0.857501569       | 0.835722161       | 0.8346362         |
| 52              | 0.723730815       | 0.77956613          | 0.712148414         | 0.731282647         | 0.824054085     | 0.945078847     | 0.926493919     | 0.82592122        | 0.804428044       | 0.917558847       |
| 53              | 0.837386127       | 0.886932077         | 0.825245039         | 0.830664445         | 0.853226563     | 0.862252026     | 0.887461459     | 0.837884438       | 0.853550997       | 0.848758465       |
| 54              | 0.860541045       | 0.872571429         | 0.892324094         | 0.882249561         | 0.80089153      | 0.860606061     | 0.884760009     | 0.857224443       | 0.840610769       | 0.895859473       |
| 55              | 0.875             | 0.895585144         | 0.926484751         | 0.861618799         | 0.827009646     | 0.898843073     | 0.911693222     | 0.887537994       | 0.818706347       | 0.89476646        |
| 56              | 0.853947085       | 0.852649007         | 0.907621247         | 0.834197966         | 0.75246572      | 0.9084927       | 0.896113602     | 0.810838979       | 0.723364918       | 0.889727797       |
| 57              | 0.920920646       | 0.917592671         | 0.938469813         | 0.912315424         | 0.912014497     | 0.94427777      | 0.93379976      | 0.91738508        | 0.891740303       | 0.935333629       |
| 58              | 0.895271906       | 0.911754447         | 0.885614059         | 0.893344393         | 0.933228373     | 0.959356429     | 0.961778896     | 0.922848138       | 0.929174296       | 0.917880676       |
| 59              | 0.858426057       | 0.868642663         | 0.76067175          | 0.757178612         | 0.893184996     | 0.825121546     | 0.833354143     | 0.819923372       | 0.809583514       | 0.955860008       |
| 60              | 0.931983187       | 0.896428571         | 0.938296178         | 0.890394952         | 0.862772499     | 0.925637025     | 0.89430801      | 0.883935097       | 0.798168638       | 0.873437314       |

**Supplementary Table 2. Tumor volume values.** Tumor volume values (in cc) for each MRI in the test set, calculated for ground truth (**Ground**), algorithm prediction (**Predicted**), 2D and 3D estimation techniques (**2D estimation**, **3D estimation**), clinical experts' segmentations (**Expert\_1**, **Expert\_2**, **Expert\_3**). These measures were used to evaluate differences in tumor volume calculation between algorithm, clinical experts and estimation techniques.

| MRI scan number | Ground | Predicted | 2D estimation | 3D estimation | Expert_1 | Expert_2 | Expert_3 |
|-----------------|--------|-----------|---------------|---------------|----------|----------|----------|
| 1               | 7.43   | 9.37      | 12.63         | 10.03         | 7.47     | 8.81     | 7.66     |
| 2               | 75.13  | 82.13     | 131.58        | 118.46        | 70.54    | 74.5     | 77.33    |
| 3               | 0.888  | 1.05      | 2.75          | 2.08          | 0.854    | 0.89     | 0.94     |
| 4               | 2.69   | 3.29      | 3.97          | 4.60          | 2.512    | 2.7      | 2.78     |
| 5               | 0.83   | 1.32      | 1.92          | 1.51          | 0.792    | 0.62     | 0.63     |
| 6               | 5.17   | 4.28      | 8.79          | 7.08          | 5.111    | 5.14     | 5.42     |
| 7               | 12.9   | 15.4      | 17.97         | 18.82         | 13.188   | 13.08    | 13.44    |
| 8               | 75.77  | 77.12     | 111.13        | 118.22        | 75.344   | 75.6     | 76.73    |
| 9               | 0.62   | 0.7       | 1.24          | 0.86          | 0.53     | 0.57     | 0.79     |
| 10              | 60.03  | 62.8      | 94.22         | 74.43         | 59.548   | 62.33    | 64.25    |
| 11              | 17.25  | 20.19     | 22.68         | 23.09         | 18.081   | 17.91    | 19.27    |
| 12              | 27.98  | 33        | 57.06         | 45.23         | 27.361   | 28.25    | 30.07    |
| 13              | 1.18   | 0.2       | 1.25          | 2.12          | 0.723    | 1.26     | 0.68     |
| 14              | 10.82  | 12.27     | 15.38         | 14.54         | 10.424   | 10.36    | 11.12    |
| 15              | 3.29   | 3.74      | 7.51          | 6.08          | 3.232    | 3.48     | 3.86     |
| 16              | 1.19   | 1.07      | 2.25          | 2.04          | 1.148    | 1.18     | 1.42     |
| 17              | 38.05  | 36.73     | 74.11         | 66.32         | 35.245   | 36.04    | 34.53    |
| 18              | 12.27  | 11.07     | 18.99         | 14.20         | 11.49    | 12.19    | 12.52    |
| 19              | 2.89   | 3.41      | 3.80          | 3.18          | 3.032    | 3.09     | 3.18     |
| 20              | 1.42   | 1.78      | 2.43          | 2.87          | 1.386    | 1.52     | 0        |
| 21              | 0.74   | 0.67      | 1.22          | 1.28          | 0.762    | 0.67     | 0.99     |
| 22              | 0.8    | 0.65      | 1.39          | 1.23          | 0.894    | 0.59     | 0.83     |
| 23              | 0.61   | 0.96      | 1.10          | 0.80          | 0.597    | 0.6      | 0.89     |
| 24              | 1.09   | 1.03      | 1.57          | 1.64          | 1.076    | 0.83     | 1.38     |
| 25              | 41.23  | 47.9      | 50.34         | 46.72         | 41.05    | 39.86    | 42.2     |
| 26              | 4.72   | 5.16      | 5.40          | 5.37          | 4.966    | 4.55     | 5.07     |
| 27              | 14.1   | 14.92     | 78.32         | 47.27         | 14.026   | 15.39    | 8.43     |
| 28              | 24.51  | 28.3      | 25.69         | 41.23         | 25.196   | 22.31    | 26.13    |
| 29              | 10.82  | 12.06     | 12.15         | 13.18         | 11.026   | 10.84    | 11.61    |
| 30              | 1.81   | 2.18      | 4.20          | 3.96          | 1.719    | 1.4      | 1.91     |
| 31              | 12.94  | 16.03     | 91.48         | 39.19         | 13.105   | 13.32    | 13.51    |
| 32              | 38.1   | 40.03     | 107.39        | 85.88         | 34.527   | 35.2     | 38.03    |
| 33              | 9.3    | 6.85      | 11.77         | 12.33         | 8.605    | 8        | 9.1      |
| 34              | 0.37   | 0.82      | 0.67          | 0.57          | 0.399    | 0.43     | 0.5      |
| 35              | 1.38   | 1.27      | 4.21          | 2.70          | 1.947    | 1.2      | 4.75     |
| 36              | 0.8    | 1.27      | 1.88          | 1.39          | 0.798    | 0.84     | 1.07     |
| 37              | 1.3    | 1.45      | 2.31          | 2.14          | 1.344    | 1.36     | 1.46     |
| 38              | 1.7    | 2.31      | 1.80          | 1.88          | 1.709    | 1.72     | 2.03     |
| 39              | 0.8    | 1.19      | 1.10          | 1.24          | 0.873    | 0.78     | 1        |
| 40              | 27.32  | 12.9      | 28.06         | 36.54         | 26.76    | 28.51    | 29.67    |
| 41              | 0.85   | 1.07      | 1.01          | 1.23          | 0.899    | 0.92     | 1.08     |
| 42              | 0.72   | 1.38      | 1.27          | 1.12          | 0.804    | 0.71     | 0.78     |
| 43              | 1.11   | 1.59      | 1.80          | 1.88          | 1.034    | 1.62     | 1.48     |
| 44              | 2.4    | 2.76      | 4.20          | 3.52          | 2.636    | 2.35     | 2.71     |
| 45              | 6.1    | 5.31      | 5.60          | 7.33          | 6.038    | 6.58     | 7.52     |
| 46              | 6.04   | 6.51      | 23.28         | 10.45         | 6.242    | 6.63     | 8.1      |
| 47              | 25.28  | 15.59     | 139.43        | 89.85         | 25.414   | 28.93    | 24.53    |
| 48              | 5      | 5.71      | 8.06          | 7.39          | 4.165    | 4.32     | 5.11     |
| 49              | 2.07   | 2.5       | 4.34          | 4.13          | 2.101    | 2.58     | 2.56     |
| 50              | 3.37   | 3.94      | 6.42          | 5.95          | 3.417    | 3.29     | 4.46     |
| 51              | 0.53   | 0.66      | 1.01          | 0.82          | 0.616    | 0.51     | 0.68     |
| 52              | 0.7    | 0.75      | 0.86          | 0.83          | 0.667    | 0.68     | 0.71     |
| 53              | 13.45  | 11.94     | 30.46         | 35.44         | 12.015   | 10.82    | 13.23    |
| 54              | 1.79   | 1.87      | 5.73          | 5.72          | 1.625    | 1.38     | 1.58     |
| 55              | 1.35   | 1.54      | 3.97          | 2.38          | 1.35     | 1.26     | 1.48     |
| 56              | 1.92   | 2.06      | 3.03          | 3.36          | 1.566    | 1.65     | 2.01     |
| 57              | 47.37  | 47.97     | 97.25         | 70.93         | 46.432   | 44.94    | 49.73    |
| 58              | 85.4   | 79.93     | 119.07        | 116.52        | 83.874   | 87.17    | 87.15    |
| 59              | 22.61  | 22.65     | 34.83         | 31.06         | 22.58    | 17.89    | 18.56    |
| 60              | 6.34   | 7.67      | 15.30         | 12.28         | 6.305    | 5.88     | 7.48     |
